# Supplementary material for: Uptake of COVID-19 Vaccines among Pregnant Women: A Systematic Review and Meta-Analysis
Source: MDPI journal article supplement (doi:10.3390/vaccines10050766), 2022-05-12
Supplement: s1 [file s1]

|                                                               |                 |            |                 |            |                 |                 |            |                 |
|---------------------------------------------------------------|-----------------|------------|-----------------|------------|-----------------|-----------------|------------|-----------------|
| to follow up described and explored?                          |                 |            |                 |            |                 |                 |            |                 |
| 10. Were strategies to address incomplete follow up utilized? | No              | No         | No              | No         | No              | No              | No         | No              |
| 11. Was appropriate statistical analysis used?                | Yes             | Yes        | Yes             | Yes        | Yes             | Yes             | Yes        | Yes             |
| <b>Risk of bias</b>                                           | <b>Moderate</b> | <b>Low</b> | <b>Moderate</b> | <b>Low</b> | <b>Moderate</b> | <b>Moderate</b> | <b>Low</b> | <b>Moderate</b> |

NA: not applicable

Supplement Table S1b. Quality of cross-sectional studies included in this systematic review.

|                                                                             | Hosokawa<br>et al. [9] | Taubman<br>et al. [10] | Siegel et<br>al. [11] |
|-----------------------------------------------------------------------------|------------------------|------------------------|-----------------------|
| 1. Were the criteria for inclusion in the sample clearly defined?           | Yes                    | Yes                    | Yes                   |
| 2. Were the study subjects and the setting described in detail?             | Yes                    | Yes                    | Yes                   |
| 3. Was the exposure measured in a valid and reliable way?                   | Yes                    | NA                     | Yes                   |
| 4. Were objective, standard criteria used for measurement of the condition? | Yes                    | Yes                    | Yes                   |
| 5. Were confounding factors identified?                                     | Yes                    | NA                     | Yes                   |
| 6. Were strategies to deal with confounding factors stated?                 | Yes                    | NA                     | Yes                   |
| 7. Were the outcomes measured in a valid and reliable way?                  | Yes                    | Yes                    | Yes                   |
| 8. Was appropriate statistical analysis used?                               | Yes                    | Yes                    | Yes                   |
| <b>Risk of bias</b>                                                         | <b>Low</b>             | <b>Moderate</b>        | <b>Low</b>            |

NA: not applicable

## References

1. Rottenstreich, M.; Sela, H.; Rotem, R.; Kadish, E.; Wiener-Well, Y.; Grisaru-Granovsky, S. Covid-19 Vaccination during the Third Trimester of Pregnancy: Rate of Vaccination and Maternal and Neonatal Outcomes, a Multicentre Retrospective Cohort Study. *BJOG* **2022**, *129*, 248–255, doi:10.1111/1471-0528.16941.
2. Blakeway, H.; Prasad, S.; Kalafat, E.; Heath, P.T.; Ladhani, S.N.; Le Doare, K.; Magee, L.A.; O'Brien, P.; Rezvani, A.; von Dadelszen, P.; et al. COVID-19 Vaccination during Pregnancy: Coverage and Safety. *American Journal of Obstetrics and Gynecology* **2022**, *226*, 236.e1–236.e14, doi:10.1016/j.ajog.2021.08.007.
3. Wainstock, T.; Yoles, I.; Sergienko, R.; Sheiner, E. Prenatal Maternal COVID-19 Vaccination and Pregnancy Outcomes. *Vaccine* **2021**, *39*, 6037–6040, doi:10.1016/j.vaccine.2021.09.012.
4. Razzaghi, H.; Meghani, M.; Pingali, C.; Crane, B.; Naleway, A.; Weintraub, E.; Kenigsberg, T.A.; Lamias, M.J.; Irving, S.A.; Kauffman, T.L.; et al. COVID-19 Vaccination Coverage Among Pregnant Women During Pregnancy — Eight Integrated Health Care Organizations, United States, December 14, 2020–May 8, 2021. *MMWR Morb. Mortal. Wkly. Rep.* **2021**, *70*, 895–899, doi:10.15585/mmwr.mm7024e2.
5. Lipkind, H.S.; Vazquez-Benitez, G.; DeSilva, M.; Vesco, K.K.; Ackerman-Banks, C.; Zhu, J.; Boyce, T.G.; Daley, M.F.; Fuller, C.C.; Getahun, D.; et al. Receipt of COVID-19 Vaccine During Pregnancy and Preterm or Small-for-Gestational-Age at Birth — Eight Integrated Health Care Organizations, United States, December 15, 2020–July 22, 2021. *MMWR Morb. Mortal. Wkly. Rep.* **2022**, *71*, 26–30, doi:10.15585/mmwr.mm7101e1.
6. Stock, S.J.; Carruthers, J.; Calvert, C.; Denny, C.; Donaghy, J.; Goulding, A.; Hopcroft, L.E.M.; Hopkins, L.; McLaughlin, T.; Pan, J.; et al. SARS-CoV-2 Infection and COVID-19 Vaccination Rates in Pregnant Women in Scotland. *Nat Med* **2022**, *28*, 504–512, doi:10.1038/s41591-021-01666-2.
7. UK Health Security Agency *COVID-19 Vaccine Surveillance Report Week 47*; 2021;
8. Goldshtein, I.; Steinberg, D.M.; Kuint, J.; Chodick, G.; Segal, Y.; Shapiro Ben David, S.; Ben-Tov, A. Association of BNT162b2 COVID-19 Vaccination During Pregnancy With Neonatal and Early Infant Outcomes. *JAMA Pediatr* **2022**, doi:10.1001/jamapediatrics.2022.0001.
9. Hosokawa, Y.; Okawa, S.; Hori, A.; Morisaki, N.; Takahashi, Y.; Fujiwara, T.; Nakayama, S.F.; Hamada, H.; Satoh, T.; Tabuchi, T. The Prevalence of COVID-19 Vaccination and Vaccine Hesitancy in Pregnant Women: An Internet-Based Cross-Sectional Study in Japan. *Journal of Epidemiology* **2022**, JE20210458, doi:10.2188/jea.JE20210458.
10. Taubman – Ben-Ari, O.; Weiss, E.; Abu-Sharkia, S.; Khalaf, E. A Comparison of COVID-19 Vaccination Status among Pregnant Israeli Jewish and Arab Women and Psychological Distress among the Arab Women. *Nursing & Health Sciences* **2022**, nhs.12929, doi:10.1111/nhs.12929.
11. Siegel, M.R.; Lumbreras-Marquez, M.I.; James, K.; McBay, B.R.; Gray, K.J.; Schantz-Dunn, J.; Diouf, K.; Goldfarb, I.T. *Perceptions and Attitudes Towards COVID-19 Vaccination Amongst Pregnant and Postpartum Individuals*; Obstetrics and Gynecology, 2021;
